# Supplementary material
Source: PubMed Central journal article supplement (PMC7346243)
Supplement: ao0c02032_si_001.pdf [file ao0c02032_si_001.pdf]

## Supporting Information

### **Gold-Silver bimetallic nanoparticles reduced with herbal leaf extracts induce ROS-mediated death in both promastigote and amastigote stages of *Leishmania donovani***

**Dayakar Alti<sup>1</sup>, M. Veeramohan Rao<sup>2</sup>, D. Narayana Rao<sup>3</sup>, Radheshyam Maurya<sup>1\*</sup> and Suresh K. Kalangi<sup>4\*</sup>**

<sup>1</sup>Department of Animal Biology, School of Life Sciences, University of Hyderabad, Hyderabad, Telangana -500046, India.

<sup>2</sup>Department of Physics, Pondicherry University, Puducherry-605014

<sup>3</sup>School of Physics, University of Hyderabad, Hyderabad, Telangana-500046, India.

<sup>4</sup>Amity Stem Cell Institute, Amity Medical School, Amity University Haryana, Pachgaon, Manesar Gurugram (HR)-122413, India.

#### **Corresponding author Address**

**Suresh K. Kalangi, Ph.D.**

Amity Stem Cell Institute,  
Amity Medical School,  
Amity University Haryana,  
Amity Education Valley, Pachgaon,  
Manesar Gurugram (HR)-122413, India.

Email: [skkalangi@ggn.amity.edu](mailto:skkalangi@ggn.amity.edu)

Orchid ID: <https://orcid.org/0000-0002-7328-9322>

1. BNPs cytotoxicity against THP-1 macrophages

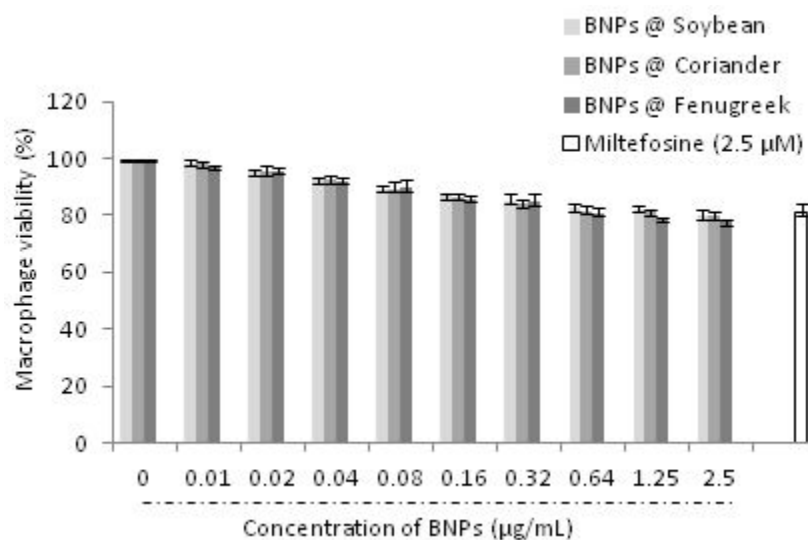

**Figure S1: BNPs cytotoxicity against THP-1 macrophages;** on the bar graph, X-axis represents the BNPs concentration between 0.01 to 2.5 µg/mL and Y-axis indicates the percentage of macrophage viability. Miltefosine (2.5 µM or 1 µg/mL) treatment was the positive control.
